1                   **Comparison of Mucosal and Intramuscular**  
2                   **Immunization against SARS-CoV-2 with Replication-**  
3                   **Defective and Replicating Single-cycle Adenovirus**  
4                   **Vaccines**

5  
6   Haley E. Mudrick<sup>1</sup>, Erin B. McGlinch<sup>2</sup>, Brian J. Parrett<sup>2,3</sup>, Jack R. Hemsath<sup>2</sup>, Mary E.  
7   Barry<sup>4</sup>, Jeffrey D. Rubin<sup>3</sup>, Chisom Uzendu<sup>3</sup>, Michael J. Hansen<sup>5</sup>, Courtney L.  
8   Erskine<sup>5</sup>, Virginia P. VanKeulen<sup>5</sup>, Aleksandra Drelich<sup>6</sup>, Chien-Te Kent Tseng<sup>6,7</sup>,  
9   Shane Massey<sup>8</sup>, Madiha Fida<sup>4</sup>, Gina A. Suh<sup>4</sup>, Tobias Peikert<sup>5,9,10</sup>, Matthew S.  
10   Block<sup>5,9</sup>, Gloria R. Olivier<sup>11</sup>, and Michael A. Barry<sup>4,5,12#</sup>

11  
12   <sup>1</sup>Molecular Pharmacology and Experimental Therapeutics (MPET) Graduate Program

13   <sup>2</sup>Graduate Research Education Program (GREP)

14   <sup>3</sup>Virology and Gene Therapy (VGT) Graduate Program

15   <sup>4</sup>Department of Medicine, Division of Infectious Diseases

16   <sup>5</sup>Department of Immunology

17   <sup>9</sup>Department of Medical Oncology

18   <sup>10</sup>Department of Medicine, Division of Pulmonary Care

19   <sup>11</sup>Mayo Clinic Ventures

20   <sup>12</sup>Department of Molecular Medicine

21    Mayo Clinic, Rochester, MN

22  
23   <sup>6</sup>Department of Microbiology and Immunology

24   <sup>7</sup>Center of Biodefense and Emerging Disease

25   <sup>8</sup>Institutional Office of Regulated Nonclinical Studies

26    University of Texas Medical Branch, Galveston, TX

27  
28  
29   **Running Title: Mucosal and Systemic Single-cycle COVID-19 Vaccine**

30  
31  
32   **# Correspondence to:**   Michael A. Barry, PhD.  
33                                    Mayo Clinic, 200 First Street SW  
34                                    Rochester, MN, USA.  
35                                    Tel: 507-266-9090  
36                                    E-mail: [mab@mayo.edu](mailto:mab@mayo.edu)

38 **Abstract**

39 SARS-CoV-2 enters the body at mucosal surfaces, such as the nose and lungs. These  
40 events involve a small number of virions at these mucosal barriers and are therefore a  
41 strategic point to stop a COVID-19 infection before it starts. Despite this, most vaccines  
42 against COVID-19 are being injected into the muscle where they will not generate the  
43 highest levels of mucosal protection. The vaccines that are approved for use in humans  
44 are all replication-defective (RD) mRNA, DNA, or adenovirus (Ad) vaccines that do not  
45 amplify antigen transgenes. We developed single cycle adenovirus (SC-Ad) vectors that  
46 replicate antigen genes up to 10,000-fold in human cells, but that are disabled from  
47 producing infectious Ad particles. We show here that SC-Ad expressing the full-length  
48 SARS-CoV-2 spike protein produces 100-fold more spike protein than a matched RD-Ad-  
49 Spike vector. When Ad-permissive hamsters were immunized with these vaccines by  
50 intranasal (IN) or intramuscular (IM) routes, SC-Ad produced significantly stronger  
51 antibody responses as compared to RD-Ad against the spike protein that rose over 14  
52 weeks after one immunization. Single IN or IM immunizations generated significant  
53 antibody responses in serum and in bronchoalveolar lavages (BALs). IN priming, but not  
54 IM priming, generated HLA-restricted CD8 T cell responses in BALs. SC-Ad-Spike  
55 generated antibodies that retain binding to spike receptor binding domains (RBDs) with  
56 mutations from new viral variants. These data suggest empowering the genomes of gene-  
57 based vaccines with the ability to amplify antigen genes can increase potency. This may  
58 be particularly advantageous when applying mucosal vaccines to combat mucosal  
59 pathogens like SARS-CoV-2.

60

## 61 **One Sentence Summary**

62 Arming adenovirus vaccines with the ability to replicate vaccine antigen genes may  
63 increase potency for systemic, or more importantly, mucosal immunization against  
64 mucosal pathogens.

65

## 66 **Introduction**

67 In December 2019, a cluster of pneumonia cases were identified in Wuhan, China, which  
68 were later found to be caused by a novel coronavirus: severe acute respiratory syndrome  
69 coronavirus-2 (SARS-CoV-2) (Li & al., 2020) (Gralinski & Menachery, 2020). As of April  
70 2021, there have been over 130,000,000 cases and nearly 3,000,000 deaths world-wide  
71 (Johns Hopkins University Coronavirus Resource Center).

72 Nearly every vaccine technology has been deployed to combat this pandemic (reviewed  
73 in (1)). mRNA vaccines advanced through the development and regulatory processes  
74 most quickly and have been given emergency authorization from the FDA and other  
75 international regulators. Replication-defective adenovirus (RD-Ad) gene-based vaccines  
76 have also been advanced by several countries and companies, including chimpanzee Ad,  
77 human Ad serotype 5 (Ad5), human Ad serotype 26 (Ad26), and others. Each of these  
78 vaccines has their strengths and weaknesses, and most will not be revealed until human  
79 studies are completed.

80 While many of the advanced vaccines have great promise, they perhaps miss out on two  
81 opportunities to combat SARS-CoV-2 and other mucosal pathogens. First, most COVID-

82 19 vaccines are administered intramuscularly (IM) and not at the site of SARS-CoV-2  
83 entry into the body. Second, most COVID-19 vaccines do not harness the power of  
84 transgene replication to amplify antigen production and immune responses.

85 Most Ad vaccines are RD-Ads (reviewed in (2, 3)). For example, the Johnson & Johnson  
86 human Ad26 vaccine (4), the ChAdOx1 vaccine from Oxford/AstraZeneca (5), the  
87 Russian Sputnik V Ad26 and Ad5 vaccines (6), and most others are RD-Ad vaccines.  
88 Converting a wild replication-competent Ad to an RD-Ad is achieved by deleting the  
89 adenovirus' pivotal master regulator gene, E1, to prevent them from causing Ad  
90 infections. An RD-Ad can efficiently deliver vaccine genes into cells to transcribe and  
91 translate vaccine antigens. However, after gene delivery, the DNA genome of an RD-Ad  
92 is not replicated (reviewed in (2, 3)). Therefore, one incoming RD-Ad vaccine antigen  
93 gene remains one gene. This gene can be very efficiently expressed, but it is not  
94 amplified.

95 By contrast, an E1-intact replication-competent adenovirus (RC-Ad) vector will infect a  
96 human cell and replicate an antigen gene DNA up to 10,000-fold in each infected cell (7-  
97 18). While RC-Ad vaccines are documented to be more potent than benchmark RD-Ad  
98 vectors, RC-Ads can cause actual adenovirus infections in vaccinees (19).

99 We developed single-cycle Ad (SC-Ad) vectors to take advantage of DNA replication  
100 while disabling the production of infectious progeny viruses (20-23). SC-Ads retain E1  
101 genes and replicate their DNA just as well as RC-Ads, but are deleted for the gene for  
102 Ad's pIIIa capsid cement protein, so that they produce empty defective particles (20). SC-  
103 Ads appear able to generate more robust and persistent immune responses than RD-Ads

104 (21, 24) and have shown promise as vaccines against influenza (24), Ebola virus, HIV-1  
105 (25-27), and against *Clostridium difficile* after single immunization (22, 28).

106 In this work, we generated RD-Ad and SC-Ad vectors expressing the wild-type original  
107 SARS-CoV-2 spike protein. Here, we compare the ability of RD-Ad and SC-Ad to produce  
108 the spike protein and generate immune responses in small animals. We also compare  
109 the ability of mucosal intranasal (IN) immunization relative to systemic intramuscular (IM)  
110 immunization to generate immune responses in systemic and mucosal compartments.

## 111 **Materials and Methods**

112 **Single-cycle Adenovirus Expressing Wild-type SARS-CoV-2 spike.** A codon-  
113 optimized cDNA encoding the original wild-type spike protein from severe acute  
114 respiratory syndrome coronavirus 2 isolate 2019-nCoV\_HKU-SZ-002a\_2020, accession  
115 number MN938384.1 was synthesized by Genewiz. This full-length sequence was  
116 inserted into the shuttle plasmid pAd6-NdePfl-CMV-MCS-3X-LZL. This sequence was  
117 recombined into pAd6- $\Delta$ E1- $\Delta$ E3 and pAd6- $\Delta$ IIIa- $\Delta$ E3 by red recombination as in (20-22)  
118 to generate RD-Ad6-spike and SC-Ad-Spike, respectively. These viruses were cut with  
119 AsiSI to liberate their viral genomes, and these were transfected into 293-IIIa cells to  
120 rescue the viruses. The viruses were purified from 10 Plate CellStacks (Corning) on two  
121 CsCl gradients and used as virus particles (vp) based on OD260 measurements (20-22).

122 **Western Blotting.** Human A549 lung cells were infected with RD- or SC-Ad spike at the  
123 indicated multiplicities of infection (MOI) and harvested 24 hours later. 5X sodium dodecyl  
124 sulfate with 5mM dithiothreitol was added to cell lysate and heat-inactivated at 95°C for 5

125 minutes. Cell lysate was run by western blot using PowerPac™ HC (Bio-Rad) at 110 volts  
126 for 70 minutes. Gel was incubated in 1X transfer buffer while the membrane was  
127 prepared. Membrane was prepared by soaking 15 seconds in methanol, shaking 2  
128 minutes in ddH<sub>2</sub>O on orbital shaker, and shaking 5 minutes in 1X transfer buffer. Gel was  
129 transferred to membrane via TransBlot® SD Semi-Dry Transfer Cell (Bio-Rad) at 15 volts  
130 for 15 minutes. Membrane was washed with 1X TBST on orbital shaker for 5 minutes.  
131 Membrane was incubated on orbital shaker in blocking buffer (5% milk powder in TBST)  
132 for 2 hours at room temperature. Membrane was washed with 1X TBST 3 times for 15  
133 seconds each, then 3 times for 5 minutes each. Membrane was incubated in primary  
134 antibody, SARS-CoV-2 spike antibody [1A9] (GeneTex), diluted in blocking buffer at a  
135 1:1000 dilution for 1 hour. Membrane was washed with 1X TBST 3 times for 15 seconds  
136 each, then 3 times for 5 minutes each. Membrane was incubated in secondary antibody,  
137 GOXMO HRP HIGH XADS (Invitrogen), diluted in blocking buffer at a 1:10,000 dilution  
138 for 1 hour. Membrane was washed with 1X TBST 3 times for 15 seconds each, then 3  
139 times for 5 minutes each. Membrane was coated with 750 µL SuperSignal™ West  
140 Maximum Sensitivity Substrate (Thermo Scientific) and imaged on the  
141 ChemiDoc™ Imaging System (Bio-Rad).

142 **Animals.** BALB/c mice were purchased from Charles River Laboratories. Syrian  
143 hamsters were purchased from Envigo. All animal handling and experiments were carried  
144 out according to the provisions of the Animal Welfare Act, PHS Animal Welfare Policy,  
145 the principles of the NIH Guide for the Care and Use of Laboratory Animals, and the  
146 policies and procedures of the Mayo Clinic. This study was conducted in Mayo Clinic's  
147 AAALAC (Association for the Assessment and Accreditation of Laboratory Animal Care)-

148 accredited facilities and were approved by the Institutional Animal Care and Use  
149 Committee (IACUC). Mice and hamsters were housed in the Mayo Clinic Animal Facility.

150 **Immunizations.** Mice and hamsters were anesthetized with isoflurane prior to  
151 immunizations by the indicated routes: intramuscular (IM), intranasal (IN), sublingual  
152 (Sub). For intramuscular immunization, 50 $\mu$ L of a solution of virus diluted in PBS was  
153 injected into each flank for a total volume of 100 $\mu$ L per animal. Intranasal immunization  
154 was performed by pipetting 40 $\mu$ L of a solution of virus diluted in PBS dropwise into the  
155 nostrils of each animal. Each animal received a total volume of 40 $\mu$ L, alternating pipetting  
156 between nostrils.

157 **Bronchoalveolar Lavage (BAL).** BALs were performed as described in (29). Mice were  
158 euthanized via CO<sub>2</sub> gas, then sterilized with 70% ethanol. Scissors were used to open  
159 the chest cavity up to the chin and to expose the trachea. A razor was used to puncture  
160 the trachea, and 1mL PBS was pipetted into and out of the lungs. This was repeated 2  
161 additional times, giving a total volume of 3mL. Cells were then pelleted out of the  
162 bronchoalveolar lavage fluid by centrifugation. The cells were used to run flow cytometry,  
163 and the supernatant fluid was used to run ELISA.

164 **Lung Tissue Single Cell Suspension.** Lung cells were isolated as described in (29).  
165 Briefly, lungs were extracted and processed with a gentleMACS dissociator (Miltenyi  
166 Biotec) and placed in gentleMACS C tubes containing 2.5mL RPMI, 40.4  $\mu$ L of 14 U/mL  
167 concentration Roche Liberase TM, and 62.5  $\mu$ L DNase I at 1 mg/mL concentration.  
168 Program Lung\_01 was performed on the gentleMACS dissociator, followed by a one-hour  
169 incubation at 37°C. 2.5mL RPMI with 10% fetal bovine serum was added before running

170 program Lung\_02. All tubes were centrifuged for 5 minutes at 250 xg, and the contents  
171 were transferred to a 50 mL conical tube via a 70 µm mesh. 2.5 mL RPMI with 10% fetal  
172 bovine serum was added to the gentleMACS tubes and poured over the mesh to wash.  
173 50 mL conical tubes were centrifuged for 10 minutes at 250 xg, and the supernatant was  
174 aspirated and discarded. Cell pellets were resuspended in 2 mL ammonium-chloride-  
175 potassium lysis buffer and centrifuged for 5 minutes at 350 xg. Supernatants from this  
176 reaction were discarded and the cell pellet was washed by resuspending in 2 mL PBS  
177 and was centrifuged for 5 minutes at 350 xg. Supernatants were extracted and discarded.  
178 The cell pellet was resuspended in desired volume RPMI and analyzed by flow cytometry.

179 **Sample Collections.** At indicated time points, the animals were anesthetized with  
180 isoflurane and serum was collected by cheek bleed in mice or from jugular veins in  
181 hamsters. In addition, for bronchoalveolar lavage, the mice were euthanized via CO<sub>2</sub> and  
182 bronchoalveolar lavage was performed according to the procedure described.

183 **Antibody ELISAs.** Binding IgG and IgA antibody responses in mouse serum, hamster  
184 serum, and bronchoalveolar lavage fluid were measured by ELISA against spike S1  
185 protein and SARS-CoV-2 receptor binding domain variants. Flat-bottom plates  
186 (ThermoFisher) were coated with 10 ng/well of spike S1 antigen in 100 µl PBS or 100  
187 ng/well SARS-CoV-2 receptor binding domain variant antigen in 100 µl PBS, including a  
188 triplicate of negative control wells, which received no protein antigen. The protein antigen  
189 used for most SARS-CoV-2 ELISAs was recombinant SARS-CoV-2 (2019-nCoV) spike  
190 S1-Fc from Sino Biological. The protein antigen used for the SARS-CoV-2 variants  
191 included S1 proteins and receptor binding domain (RBD) Recombinant Proteins, also



192 from Sino Biological. These included the following His6-tagged proteins expressed from  
193 293 human cells: Wild-type; K417N; N429K; Y453F; S477N; E484K; N501Y; and K417N,  
194 E484K, N501Y, triple mutant corresponding to the South African variant, B.1.351. spike  
195 S1s with the single D614G and K417N, E484K, N501Y were also tested.

196 Plates were left overnight at 4°C. Plates were washed with 200 µl 1X PBS 2 times,  
197 followed by adding 200 µl per well of blocking buffer, consisting of 5% milk powder in  
198 TBST, for 2 hours at room temperature. Plates were washed with 200 µl 1X PBS 2 times.  
199 All samples were run in triplicate, including a triplicate of positive and negative control  
200 wells in each plate. Samples were serially diluted in blocking buffer and were transferred  
201 to the assay plate and incubated for 3 hours at room temperature. For the positive control  
202 wells, SARS-CoV-2 spike antibody [1A9] (GeneTex) was used as the primary antibody.  
203 Plates were washed with 200 µl 1X PBS 4 times, followed by addition of the secondary  
204 antibody. For hamster samples, the secondary antibodies used were: Peroxidase  
205 Conjugated Affinity Purified Anti-Golden Syrian Hamster IgG (H&L) Goat (Rockland Inc.),  
206 and Rabbit Anti-Hamster IgA (Brookwood Biomedical). For mouse samples, the  
207 secondary antibodies used were: GOXMO HRP HIGH XADS (Invitrogen), and HRP-Goat  
208 Anti-Mouse IgA (Invitrogen). The secondary antibody for the positive controls was Purified  
209 Recomb<sup>TM</sup> Protein A/G Peroxidase Conjugated (Invitrogen). Plates were left to incubate  
210 with the primary antibody for 2 hours at room temperature. Plates were washed with 200  
211 µl 1X PBS 4 times. 50 µl 1-Step<sup>TM</sup> Ultra TMB-ELISA was added to each well and left at  
212 room temperature for 30 minutes, then 50 µl 2M sulfuric acid was added to each well.  
213 Plates were read at 450nm in a Synergy H1 microplate reader (BioTek). All statistical  
214 analyses were done by one-way ANOVA.

215 **Neutralization Assays.** Pseudo-neutralization assays were performed on hamster  
216 serum using the cPass™ Neutralization Antibody Detection kit (GenScript).

217 **ELISPOT Assay for Detecting Antigen-specific IFN- $\gamma$  producing Cells.** Freshly-  
218 isolated splenocytes were stimulated with spike S1 or S2 subunit protein (1  $\mu\text{g}/\text{mL}$ ) to  
219 determine the numbers of IFN- $\gamma$ -producing cells by the Enzyme Linked Immuno Spot  
220 (ELISPOT) assay using the methodology reported previously (30). Briefly, splenocytes  
221 were plated at  $2.5 \times 10^5$  cells per well in triplicate in 96-well plates. Cells were incubated  
222 at 37 °C with medium alone, human papilloma virus E7 peptide (negative control), SARS-  
223 CoV-2 spike protein S1 subunit (1  $\mu\text{g}/\text{ml}$ ), SARS-CoV-2 spike protein S2 subunit (1  
224  $\mu\text{g}/\text{ml}$ ), tetanus toxoid (TT, negative control, 100ng/ml), or concanavalin A (Con A),  
225 positive control, 10ng/ml. After 24 h, cells were transferred to nitrocellulose plates, coated  
226 with anti-IFN- $\gamma$  antibody, and incubated for 24 more hours. Plates were then washed and  
227 incubated with biotinylated anti-IFN- $\gamma$  antibody, streptavidin-alkaline phosphatase, and  
228 colorimetric substrate, with washes between each step. After drying overnight, the plates  
229 were read on an AID ELIspot reader (San Diego, CA). Antigen-specific T cells were  
230 defined as the average number of spots elicited by the antigen of interest minus the  
231 average number of spots elicited when cells were incubated with culture medium alone,  
232 without the addition of any peptides.

233 **Flow Cytometry.** Bronchoalveolar lavage samples were centrifuged at 1500rpm for 5  
234 minutes, and the supernatant BAL fluid was removed. The cell pellet was resuspended  
235 in 200  $\mu\text{l}$  T-Cell Media (IMDM with 10% FBS, Pen/Strep, and 2-ME), and was then added  
236 to a 96-well plate. 2  $\mu\text{l}$  of stimulating mix (500  $\mu\text{g}/\text{mL}$  ionomycin, 50  $\mu\text{g}/\text{mL}$  PMA, and 445

237  $\mu$ l T-Cell Media) was added to each well to be stimulated, and was incubated overnight  
238 at 37°C. 100  $\mu$ l of a GolgiPlug Mix (1  $\mu$ l GolgiPlug/1mL T-Cell Media) was added to each  
239 well and thoroughly mixed by pipetting before incubating for 4-6 hours at 37°C. Cells  
240 were centrifuged at 1500rpm for 5 minutes and supernatant was removed. Cell surface  
241 antibodies were added in 50  $\mu$ l total volume in FACS Buffer, then incubated 30 minutes  
242 on ice. Plates were washed twice with FACS buffer, resuspending cells in FACS Buffer  
243 and centrifuging for 5 minutes at 1500rpm to remove supernatant. The cells were then  
244 pelleted by centrifugation at 1500rpm for 5 minutes. Cell pellet was resuspended in 100  
245  $\mu$ l of Fix/Perm Solution for 20 minutes at 4°C before being washed twice with 1X BD  
246 Perm/Wash Buffer, then centrifuging at 1500rpm for 5 minutes to pellet. Intracellular  
247 cytokine antibodies were diluted in 50  $\mu$ l 1X BD Perm/Wash Buffer and added to each  
248 well. Plate was then incubated 30 minutes on ice. Plates were washed twice with 1X BD  
249 Perm/Wash Buffer, resuspending cells in 1X BD Perm/Wash Buffer and centrifuging for  
250 5 minutes at 1500rpm to remove supernatant. Cells were resuspended in 500  $\mu$ l 1% PFA  
251 and left at 4°C overnight before flow cytometry analysis.

252 **Statistical Analysis.** Prism 9 Graphical software was used for all statistical analyses.

## 253 **RESULTS**

254 **Replication-defective and Single-cycle Adenoviruses Expressing SARS-CoV-2**  
255 **Spike Protein.** A codon-optimized cDNA encoding the original wild-type spike protein  
256 from the 2019-nCoV HKU-SZ-002a 2020 isolate was inserted into adenovirus vectors.  
257 This cDNA uses all native spike sequences and secretory leader and does not bear

258 modifications such as proline mutations to alter spike structure (4, 5, 31). This cDNA was  
259 inserted into a cytomegalovirus (CMV) expression cassette and was used to generate  
260 human adenovirus serotype 6 (HAdV-C6, Ad6) vectors RD-Ad6-spike and SC-Ad6-spike,  
261 respectively (**Fig. 1A**). These vectors were tested for spike protein expression by infection  
262 of human A549 lung cells at varied multiplicities of infection (MOI) (**Fig. 1B**). Western blot  
263 on cells harvested 24 hours after infection demonstrated that both vectors produced spike  
264 protein; however, RD-Ad-Spike only generated detectable protein with  $10^4$  virus particles  
265 (vp) per cell, but not with 100 vp/cell. In contrast, SC-Ad-Spike produced protein with 100  
266 or more vp/cell with higher expression than RD-Ad at each dose.

267 **Comparison of Antibody Responses by RD-Ad-Spike and SC-Ad-Spike in**  
268 **Adenovirus-permissive Syrian Hamsters.** Human Ad6 replicates its genome up to  
269 100,000-fold in human cells (32, 33). SC-Ad replicates DNA identically to RC-Ad (33).  
270 Unfortunately, mice do not support the full life cycle or replication of human adenoviruses  
271 (34). Therefore, the administration of SC-Ad to mice may underrepresent the effect of  
272 transgene amplification that would be observed in humans and model organisms that are  
273 permissive to human adenovirus infection. In contrast to mice, Syrian hamsters are  
274 partially permissive for human adenoviruses (34) and their cells allow 350-fold replication  
275 of Ad6 DNA after infection (24). Immunization by RD-Ad and SC-Ad-Spike were therefore  
276 compared in Ad6-permissive Syrian hamsters to allow at least partial DNA replication to  
277 occur.

278  $10^9$  vp of RD-Ad-Spike and SC-Ad-Spike were used to immunize male Syrian hamsters  
279 by IN and IM routes. These were compared to negative control RD- and SC-Ad

280 expressing GFP-Luciferase (GL). Animals were immunized a single time and sera were  
281 collected at varied times thereafter (**Fig. 2**). Under these conditions, SC-Ad-Spike  
282 generated significantly higher spike antibody levels than RD-Ad-GL or SC-Ad-GL  
283 expressing GFP-Luciferase or when compared to RD-Ad-Spike at a fixed dilution  
284 (1/1,000) of sera. SC-Ad-Spike delivered by the intramuscular route generated higher IgG  
285 at all time points through 6 months after single immunization ( $p < 0.0001$  by ANOVA)  
286 (**Figs. 2 and 3C and D**). SC-Ad-Spike by the intranasal route generated significantly  
287 higher IgG in sera at 6 weeks and 14 weeks, but not at 2 weeks and 6 months after single  
288 immunization ( $p < 0.0001$  and  $p < 0.001$  at 6 and 14 weeks). Serial dilution of these sera  
289 samples revealed reciprocal endpoint spike binding titers of 100 for RD-Ad-Spike by both  
290 routes (**Fig. 3A**). In contrast, SC-Ad-Spike by IN route had reciprocal binding titers of  
291 1,000 ( $p < 0.05$ ). SC-Ad-Spike by the IM route had reciprocal titers of 1,000 or greater ( $p$   
292  $< 0.0001$ ). This experiment was repeated in female Syrian hamsters with similar results  
293 (**Supplemental Figs. 2 and 3**).

294 Varied dilutions of 6-week sera were assayed for SARS-CoV-2 neutralization antibodies  
295 with the cPass™ Neutralization Antibody Detection kit that assays antibodies that block  
296 binding of spike receptor binding domain (RBD) to ACE2. Under these conditions, RD-Ad  
297 vaccinated hamsters failed to generate significant spike RBD inhibition at any dilution. In  
298 contrast, animals immunized with SC-Ad-Spike by the IN and IM route had significantly  
299 higher inhibition at all dilutions than RD-Ads within 6 weeks of single immunization (**Fig.**  
300 **3B**).

301 **Antibody Binding to Spike Variants.** SARS-CoV-2 has undergone rampant viral  
302 evolution as it has infected millions of humans. The emergence of SARS-CoV-2 variant  
303 B.1.1.7 in the UK, B.1.351 in South Africa, P.1 in Brazil, and a rash of other new variants  
304 raise significant concerns about the ability of vaccines to protect against them (35-37).  
305 These mutations are particularly concerning when they affect antibodies that bind to the  
306 ACE2 receptor binding domain, RBD, of spike. The SARS-CoV-2 variant B.1.1.7 contains  
307 H69del, V70del, Y144del, N501Y, A570D, D614G, and P681H mutations. The B.1.351  
308 has K417N, E484K, N501Y, and D614G mutations. The P.1 variant bears K417T, E484K,  
309 and N501Y mutations (35-37). Mutations in the RBD domain are of most concern  
310 considering that they can impact the ability of neutralizing antibodies to block binding of  
311 the spike protein to ACE2.

312 Given concerns about these variants, week 14 sera from hamsters immunized IM with  
313 the negative control vaccine SC-Ad-GL and SC-Ad-Spike (**Fig. 2 and 3**) were compared  
314 for their ability to bind spike RBD (amino acids 319 to 541) and S1 variants (amino acids  
315 16 to 685)(**Fig. 4 and Supplemental Fig. 3**). The RBD from the original SARS virus was  
316 also included as a reference. ELISAs performed at 1/1,000 dilutions demonstrated  
317 significant binding by samples from SC-Ad-Spike immunized animals to all the variant  
318 RBDs and S1 proteins when compared to SC-Ad-GL samples ( $p < 0.0001$  by one-way  
319 ANOVA). SC-Ad-Spike bound the RBD from the original SARS-1 virus, but this did not  
320 reach significance at 1/1,000. When the samples were tested at 1/10,000 dilutions binding  
321 remained significant with p values remaining less than 0.0001 for all samples except the  
322 RBD with combined K417N, E484K, N501Y, which fell to a p value of less than 0.01.  
323 ELISA binding to the single E484K RBD was higher at this dilution than to other RBDs,

324 suggesting some difference in structure or an artifact. When further 1/20,000 dilutions  
325 were tested, binding to all variants was still significantly different between SC-Ad-Spike  
326 and SC-Ad-GL samples ( $p < 0.05$  to  $0.0001$ ), except for K417N, E484K, N501Y RBD,  
327 which was no longer significantly different. While binding to the K417N, E484K, N501Y  
328 RBD was lost, binding to the larger S1 protein with K417N, E484K, N501Y, and D614G  
329 mutations remained significant ( $p < 0.01$ ). This was not unexpected, since the larger spike  
330 S1 protein has many more epitopes for polyclonal antibody binding.

331 **Comparison of the Routes of Immunization by SC-Ad-Spike in Mice.** Mice were  
332 utilized to evaluate the effects of the route of immunization of SC-Ad-Spike, since few  
333 immunological reagents exist to evaluate these responses in hamsters. BALB/c mice  
334 were immunized by IN and IM routes with PBS,  $10^{10}$  vp of SC-Ad expressing Zika E  
335 protein, or  $10^{10}$  vp of SC-Ad-Spike, and antibody responses were evaluated. This 10-fold  
336 higher dose was used to compensate for the lack of SC-Ad-Spike DNA replication in the  
337 mouse model. Under these conditions, mice immunized with SC-Ad-Spike generated  
338 robust IgG antibody responses within 2 weeks of immunization ( $p < 0.0001$  by one-way  
339 ANOVA by both routes, **Fig. 5**).

340 **Effects of the Routes of Immunization on Mucosal Antibody Responses in the**  
341 **Lungs.** Five animals from selected groups in **Fig. 5** were sacrificed 8 weeks after single  
342 immunization and bronchoalveolar lavages (BALs) were performed to collect mucosal  
343 antibodies and immune cells from the lungs. The 3 mL BAL washes were diluted 1/500  
344 and were used to detect anti-spike IgG and IgA antibodies by ELISA. By 8 weeks after  
345 single immunization, the mice had significant levels of IgG antibodies in their BALs ( $p <$

346 0.01 and 0.001, **Fig. 6A**). Notably, significant anti-spike IgA antibodies were only  
347 observed in IN-immunized mice ( $p < 0.01$ ). When BAL samples were tested for RBD  
348 neutralizing activity, both the IN and IM-immunized mice had significant activities ( $p <$   
349  $0.01$  and  $0.05$ , respectively, **Fig. 6B**).

### 350 **Effects of the Routes of Immunization on Mucosal T Cell Responses in the Lungs.**

351 BAL samples were also examined for the presence of T cells in the lung. The small  
352 number of cells obtained and an absence of known spike T cell epitopes for BALB/c mice  
353 precluded testing for spike-specific responses; however, when flow cytometry was  
354 performed, IFN- $\gamma$  and IL-4-expressing CD4 and CD8 T cells were detected in BAL  
355 samples (**Fig. 7**). These analyses revealed no significant increases in CD4 or CD8 T cells  
356 in BAL samples after IM immunization. In contrast, there were significant increases in  
357 CD8<sup>+</sup> IFN- $\gamma$ <sup>+</sup>, CD4<sup>+</sup> IFN- $\gamma$ <sup>+</sup>, and CD4<sup>+</sup> IL-4<sup>+</sup> T cells in the BALs of animals immunized  
358 intranasally with either SC-Ad-Zika E or SC-Ad-Spike.

### 359 **Effects of the Routes of Immunization on Systemic T Cell Responses.**

360 Splenocytes from the animals in **Fig. 7** were assayed for IFN- $\gamma$ , IL-17, and IL-4-expression by ELISPOT  
361 after stimulation with spike S1 whole protein subunit (**Supplemental Fig. 4**). These data  
362 demonstrated higher splenocyte IFN- $\gamma$ , IL-17, and IL-4 responses in the BALB/c mice after  
363 IN immunization than after IM immunization.

## 364 **DISCUSSION**

365 The purpose of this study was to compare RD- and SC-Ad vaccines expressing the  
366 SARS-CoV-2 spike protein and to evaluate whether mucosal immunization may have



367 utility when considering vaccines against a mucosal pathogen like SARS-CoV-2. These  
368 data suggest that vaccines that retain the ability to replicate their DNA can drive more  
369 potent and long-lasting immune responses than non-replicating vaccines. These data  
370 also suggest that there may be advantages to delivering vaccines at mucosal sites by  
371 single immunization or as a prime followed by later boost.

372 Consistent with previous comparisons, SC-Ad expressed higher levels of antigen than  
373 matched RD-Ad vector. This higher expression by SC-Ad-Spike translated into higher  
374 serum antibody responses than RD-Ad-Spike in adenovirus-permissive Syrian hamsters  
375 after single immunization by either the IM or IN route. The levels of antibodies in sera  
376 were higher in animals immunized by the intramuscular route than the intranasal route.  
377 In all the animal models, antibody titers were higher in ELISA assays than in varied  
378 neutralization assays, as expected. This may reflect, in part, the use of the wild-type spike  
379 protein sequence rather than modified spikes locked in the “up” position (4). Use of such  
380 a modified spike would likely increase neutralization by SC-Ad.

381 SC-Ad-Spike generated antibodies from these hamsters were able to cross-react in  
382 ELISA assays against several single point mutant RBD variants, including those observed  
383 in the U.K. B.1.1.7 strain and the South African B.1.351 strain. These antibodies were  
384 also able to bind K417N, E484K, N501Y RBD at 1/1,000 and 1/10,000 dilutions in ELISA,  
385 but were insignificant at 1/20,000 dilutions. This was not surprising given that the  
386 presence of three separate mutations have been shown to affect the ability of Pfizer,  
387 Moderna, and other vaccines to recognize these new variants.

388 The single-cycle replication “engine” can be applied to any adenovirus serotype. This  
389 increased potency could be utilized in two ways. In one, SC-Ad is delivered at the same  
390 virus particle doses as current RD-Ad COVID-19 vaccines to garner stronger immune  
391 responses. In the second, SC-Ad is used at a lower dose, perhaps 10 to 100-fold lower,  
392 to deliver equal potency to RD-Ad vaccines, but allowing 10 to 100 times more vaccine  
393 doses from the same size of a GMP vaccine production run. This could be pivotal for  
394 expanding access to vaccines for this pandemic or the next to vaccinate people in rich  
395 and poorer countries.

396 Species C human Ad6 was used to test proof of concept since it is equal to or is more  
397 robust than species C Ad5 as a vaccine or as an oncolytic (32, 38-42). Species C Ad5  
398 and Ad6 also appear to be more robust as gene-based vaccines than lower seroprevalent  
399 viruses like species D Ad26 and species E ChAdOx1 (38, 39, 43, 44).

400 Another interesting aspect of this work was examining if there is utility in applying these  
401 gene-based vaccines at mucosal surfaces. Hamsters have few immune reagents, so this  
402 was examined in more detail in mouse models. In mice, we show that intranasal  
403 immunization generated equal IgG antibodies in the lungs of mice, but higher IgA and  
404 CD4 and CD8 T cells in BAL samples. Intramuscular immunization was able to generate  
405 IgG antibodies in BAL fluid. However, the IM route reduce markedly low IgA antibodies  
406 than the IN route. Likewise, IM immunization failed to traffic CD4 or CD8 T cells to the  
407 lumen of the lung in contrast to IN mucosal immunization. These data suggest that IN  
408 mucosal routes of immunization may do a better job at placing effector antibody and T  
409 cells at the sites of earliest exposure to SARS-CoV-2.

410 These observations are consistent with our previous observations testing IN and IM  
411 prime-boosts with SC-Ad expressing HIV envelope in rhesus macaques (26). Animals  
412 immunized with SC-Ad by only the IM route had lower HIV-1 antibody-dependent cellular  
413 cytotoxicity (ADCC) antibody activity and lower levels of peripheral T follicular helper  
414 (pTfh) cells in their lymph nodes. Conversely, animals immunized with SC-Ad by the IN  
415 route had higher ADCC, higher Tfh cell counts in lymph nodes, and lower SHIV viral loads  
416 in their gastrointestinal tracts after rectal SHIV challenge (26). These data suggest that  
417 there may be benefits in priming the immune system at mucosal sites when immunizing  
418 against pathogens that also enter at these sites.

419 Mucosal immunization may also have utility to impact vaccine safety. There are concerns  
420 with observations of thrombotic thrombocytopenia in a small number of people who have  
421 received the Ad26 and ChAdOx1 COVID-19 (45, 46). These vaccines were delivered by  
422 the intramuscular route. Adenoviruses do not naturally infect the muscle. Ads naturally  
423 infect humans at some mucosal site (reviewed in (47)). Injection of anything into the  
424 muscle can breach blood vessels and allow leak into the bloodstream. For an  
425 intramuscular Ad vaccine, this can cause adenovirus to be absorbed by liver Kupffer cells,  
426 liver sinusoidal endothelial cells, and to productively infect liver hepatocytes, spleen, or  
427 lungs. It is therefore possible that injecting Ads into the muscle by this unnatural route  
428 may elevate the risk of side effects. It is possible that delivering adenovirus vaccines by  
429 intranasal vaccination may avoid some of these new risks. That having been said, it  
430 should be noted that intranasal immunization has its own possible side effects including  
431 retrograde transport into the olfactory bulb and Bell's palsy.

432 Another consideration is the use of adenoviruses that are low seroprevalent in humans.  
433 The primary advantage of Ad26 and ChAdOx1 is that few people have been exposed  
434 them naturally and so most people do not have neutralizing antibodies against these  
435 vaccines. While that is true, it also means that there is less experience with how these  
436 viruses behave in humans and what side effects may be observed.

437 In contrast, 27 to 100% of humans are immune to Ad5 (43). Ad6 is lower seroprevalent  
438 than Ad5, with 4 to 22% of humans having already been exposed to Ad6 (48, 49). In both  
439 cases, these humans have experienced these species C Ads after mucosal exposure  
440 without obvious connections to side effects associated with COVID-19 vaccines. One  
441 might say that both Ad5 and Ad6 have been field tested as mucosal vaccines in as many  
442 as a billion humans. Conversely, no humans have been naturally exposed to Ad5, Ad6,  
443 Ad26, or ChAdOx1 by intramuscular exposure.

444 While these common human adenoviruses may have some ironic safety value, it is still  
445 possible that arming any adenovirus or any gene-based vaccine with the SARS-CoV-2  
446 spike protein may by itself play a role in the observed thrombotic side effects by  
447 intramuscular or mucosal routes of vaccination.

448 These concepts need to be explored further. Regardless, this study suggests that  
449 mucosal immunization may have value when combating SARS-CoV-2 and other mucosal  
450 pathogens. This work also suggests that giving adenovirus vaccines the ability to replicate  
451 via single-cycle modifications may have value in increasing per virus potency or by  
452 allowing more doses to be produced by using fewer virions per person.

453 **Acknowledgements.** This work was funded by grants from Fastgrants.org/Mercatus and  
454 from the Harrington Foundation COVID-19 Scholar Program to M.A.B. This project was  
455 supported by the Walter & Lucille Rubin Fund in Infectious Diseases Honoring Michael  
456 Camilleri, M.D. at Mayo Clinic. This project would not have been possible without  
457 generous support from Mayo Benefactors and the Mayo Clinic COVID-19 Task Force.

458

459

460 **REFERENCES.**

- 461 1. B. M. Prubeta, Current State of the First COVID-19 Vaccines. *Vaccines* **9**, (2021).
- 462 2. M. O. Lasaro, H. C. Ertl, New insights on adenovirus as vaccine vectors. *Mol Ther*  
463 **17**, 1333-1339 (2009).
- 464 3. M. Barry, Single-cycle adenovirus vectors in the current vaccine landscape. *Expert*  
465 *Rev Vaccines* **17**, 163-173 (2018).
- 466 4. N. B. Mercado, R. Zahn, F. Wegmann, C. Loos, A. Chandrashekar, J. Yu, J. Liu,  
467 L. Peter, K. McMahan, L. H. Tostanoski, X. He, D. R. Martinez, L. Rutten, R. Bos,  
468 D. van Manen, J. Vellinga, J. Custers, J. P. Langedijk, T. Kwaks, M. J. G. Bakkers,  
469 D. Zuijdgeest, S. K. Rosendahl Huber, C. Atyeo, S. Fischinger, J. S. Burke, J.  
470 Feldman, B. M. Hauser, T. M. Caradonna, E. A. Bondzie, G. Dagotto, M. S. Gebre,  
471 E. Hoffman, C. Jacob-Dolan, M. Kirilova, Z. Li, Z. Lin, S. H. Mahrokhian, L. F.  
472 Maxfield, F. Nampanya, R. Nityanandam, J. P. Nkolola, S. Patel, J. D. Ventura, K.  
473 Verrington, H. Wan, L. Pessaint, A. Van Ry, K. Blade, A. Strasbaugh, M. Cabus,  
474 R. Brown, A. Cook, S. Zouantchangadou, E. Teow, H. Andersen, M. G. Lewis, Y.  
475 Cai, B. Chen, A. G. Schmidt, R. K. Reeves, R. S. Baric, D. A. Lauffenburger, G.  
476 Alter, P. Stoffels, M. Mammen, J. Van Hoof, H. Schuitemaker, D. H. Barouch,  
477 Single-shot Ad26 vaccine protects against SARS-CoV-2 in rhesus macaques.  
478 *Nature* **586**, 583-588 (2020).
- 479 5. N. van Doremalen, T. Lambe, A. Spencer, S. Belij-Rammerstorfer, J. N.  
480 Purushotham, J. R. Port, V. A. Avanzato, T. Bushmaker, A. Flaxman, M.  
481 Ulaszewska, F. Feldmann, E. R. Allen, H. Sharpe, J. Schulz, M. Holbrook, A.  
482 Okumura, K. Meade-White, L. Perez-Perez, N. J. Edwards, D. Wright, C. Bissett,

- 483 C. Gilbride, B. N. Williamson, R. Rosenke, D. Long, A. Ishwarbhai, R. Kailath, L.  
484 Rose, S. Morris, C. Powers, J. Lovaglio, P. W. Hanley, D. Scott, G. Saturday, E.  
485 de Wit, S. C. Gilbert, V. J. Munster, ChAdOx1 nCoV-19 vaccine prevents SARS-  
486 CoV-2 pneumonia in rhesus macaques. *Nature*, (2020).
- 487 6. D. Y. Logunov, I. V. Dolzhikova, O. V. Zubkova, A. I. Tukhvatullin, D. V.  
488 Shcheblyakov, A. S. Dzharullaeva, D. M. Grousova, A. S. Erokhova, A. V.  
489 Kovyrshina, A. G. Botikov, F. M. Izhaeva, O. Popova, T. A. Ozharovskaya, I. B.  
490 Esmagambetov, I. A. Favorskaya, D. I. Zrelkin, D. V. Voronina, D. N. Shcherbinin,  
491 A. S. Semikhin, Y. V. Simakova, E. A. Tokarskaya, N. L. Lubenets, D. A. Egorova,  
492 M. M. Shmarov, N. A. Nikitenko, L. F. Morozova, E. A. Smolyarchuk, E. V. Kryukov,  
493 V. F. Babira, S. V. Borisevich, B. S. Naroditsky, A. L. Gintsburg, Safety and  
494 immunogenicity of an rAd26 and rAd5 vector-based heterologous prime-boost  
495 COVID-19 vaccine in two formulations: two open, non-randomised phase 1/2  
496 studies from Russia. *Lancet*, (2020).
- 497 7. N. Malkevitch, L. J. Patterson, K. Aldrich, E. Richardson, W. G. Alvord, M. Robert-  
498 Guroff, A replication competent adenovirus 5 host range mutant-simian  
499 immunodeficiency virus (SIV) recombinant priming/subunit protein boosting  
500 vaccine regimen induces broad, persistent SIV-specific cellular immunity to  
501 dominant and subdominant epitopes in Mamu-A\*01 rhesus macaques. *J Immunol*  
502 **170**, 4281-4289 (2003).
- 503 8. J. Zhao, Y. Lou, J. Pinczewski, N. Malkevitch, K. Aldrich, V. S. Kalyanaraman, D.  
504 Venzon, B. Peng, L. J. Patterson, Y. Edghill-Smith, R. Woodward, G. N. Pavlakis,  
505 M. Robert-Guroff, Boosting of SIV-specific immune responses in rhesus macaques

- 506 by repeated administration of Ad5hr-SIVenv/rev and Ad5hr-SIVgag recombinants.  
507 *Vaccine* **21**, 4022-4035 (2003).
- 508 9. L. J. Patterson, N. Malkevitch, D. Venzon, J. Pinczewski, V. R. Gomez-Roman, L.  
509 Wang, V. S. Kalyanaraman, P. D. Markham, F. A. Robey, M. Robert-Guroff,  
510 Protection against mucosal simian immunodeficiency virus SIV(mac251)  
511 challenge by using replicating adenovirus-SIV multigene vaccine priming and  
512 subunit boosting. *Journal of virology* **78**, 2212-2221 (2004).
- 513 10. B. Peng, L. R. Wang, V. R. Gomez-Roman, A. Davis-Warren, D. C. Montefiori, V.  
514 S. Kalyanaraman, D. Venzon, J. Zhao, E. Kan, T. J. Rowell, K. K. Murthy, I.  
515 Srivastava, S. W. Barnett, M. Robert-Guroff, Replicating rather than nonreplicating  
516 adenovirus-human immunodeficiency virus recombinant vaccines are better at  
517 eliciting potent cellular immunity and priming high-titer antibodies. *Journal of*  
518 *virology* **79**, 10200-10209 (2005).
- 519 11. J. Zhao, R. Voltan, B. Peng, A. Davis-Warren, V. S. Kalyanaraman, W. G. Alvord,  
520 K. Aldrich, D. Bernasconi, S. Butto, A. Cafaro, B. Ensoli, M. Robert-Guroff,  
521 Enhanced cellular immunity to SIV Gag following co-administration of  
522 adenoviruses encoding wild-type or mutant HIV Tat and SIV Gag. *Virology* **342**, 1-  
523 12 (2005).
- 524 12. V. R. Gomez-Roman, R. H. Florese, B. Peng, D. C. Montefiori, V. S.  
525 Kalyanaraman, D. Venzon, I. Srivastava, S. W. Barnett, M. Robert-Guroff, An  
526 adenovirus-based HIV subtype B prime/boost vaccine regimen elicits antibodies  
527 mediating broad antibody-dependent cellular cytotoxicity against non-subtype B  
528 HIV strains. *J Acquir Immune Defic Syndr* **43**, 270-277 (2006).



- 529 13. V. R. Gomez-Roman, G. J. Grimes, Jr., G. K. Potti, B. Peng, T. Demberg, L.  
530 Gravlin, J. Treece, R. Pal, E. M. Lee, W. G. Alvord, P. D. Markham, M. Robert-  
531 Guroff, Oral delivery of replication-competent adenovirus vectors is well tolerated  
532 by SIV- and SHIV-infected rhesus macaques. *Vaccine* **24**, 5064-5072 (2006).
- 533 14. B. Peng, R. Voltan, A. D. Cristillo, W. G. Alvord, A. Davis-Warren, Q. Zhou, K. K.  
534 Murthy, M. Robert-Guroff, Replicating Ad-recombinants encoding non-  
535 myristoylated rather than wild-type HIV Nef elicit enhanced cellular immunity. *Aids*  
536 **20**, 2149-2157 (2006).
- 537 15. T. Demberg, R. H. Florese, M. J. Heath, K. Larsen, I. Kalisz, V. S. Kalyanaraman,  
538 E. M. Lee, R. Pal, D. Venzon, R. Grant, L. J. Patterson, B. Koriath-Schmitz, A.  
539 Buzby, D. Dombagoda, D. C. Montefiori, N. L. Letvin, A. Cafaro, B. Ensoli, M.  
540 Robert-Guroff, A replication-competent adenovirus-human immunodeficiency  
541 virus (Ad-HIV) tat and Ad-HIV env priming/Tat and envelope protein boosting  
542 regimen elicits enhanced protective efficacy against simian/human  
543 immunodeficiency virus SHIV89.6P challenge in rhesus macaques. *Journal of*  
544 *virology* **81**, 3414-3427 (2007).
- 545 16. R. Hidajat, P. Xiao, Q. Zhou, D. Venzon, L. E. Summers, V. S. Kalyanaraman, D.  
546 C. Montefiori, M. Robert-Guroff, Correlation of vaccine-elicited systemic and  
547 mucosal non-neutralizing antibody activities with reduced acute viremia following  
548 intrarectal SIVmac251 challenge of rhesus macaques. *Journal of virology*, (2008).
- 549 17. C. Morgan, M. Marthas, C. Miller, A. Duerr, C. Cheng-Mayer, R. Desrosiers, J.  
550 Flores, N. Haigwood, S. L. Hu, R. P. Johnson, J. Lifson, D. Montefiori, J. Moore,

- 551 M. Robert-Guroff, H. Robinson, S. Self, L. Corey, The use of nonhuman primate  
552 models in HIV vaccine development. *PLoS medicine* **5**, e173 (2008).
- 553 18. T. Demberg, M. Robert-Guroff, Mucosal immunity and protection against HIV/SIV  
554 infection: strategies and challenges for vaccine design. *International reviews of*  
555 *immunology* **28**, 20-48 (2009).
- 556 19. M. Gurwith, M. Lock, E. M. Taylor, G. Ishioka, J. Alexander, T. Mayall, J. E. Ervin,  
557 R. N. Greenberg, C. Strout, J. J. Treanor, R. Webby, P. F. Wright, Safety and  
558 immunogenicity of an oral, replicating adenovirus serotype 4 vector vaccine for  
559 H5N1 influenza: a randomised, double-blind, placebo-controlled, phase 1 study.  
560 *Lancet Infect Dis* **13**, 238-250 (2013).
- 561 20. C. M. Crosby, M. A. Barry, Illa deleted adenovirus as a single-cycle genome  
562 replicating vector. *Virology* **462-463**, 158-165 (2014).
- 563 21. C. M. Crosby, P. Nehete, K. J. Sastry, M. A. Barry, Amplified and persistent  
564 immune responses generated by single-cycle replicating adenovirus vaccines.  
565 *Journal of virology* **89**, 669-675 (2015).
- 566 22. S. S. Anguiano-Zarate, W. E. Matchett, P. N. Nehete, J. K. Sastry, A. Marzi, M. A.  
567 Barry, A Replicating Single Cycle Adenovirus against Ebola Virus. *J. Infectious*  
568 *Dis. in press*, (2018).
- 569 23. C. M. Crosby, M. A. Barry, Transgene Expression and Host Cell Responses to  
570 Replication-Defective, Single-Cycle, and Replication-Competent Adenovirus  
571 Vectors. *Genes (Basel)* **8**, (2017).
- 572 24. C. M. Crosby, W. E. Matchett, S. S. Anguiano-Zarate, C. A. Parks, E. A. Weaver,  
573 L. R. Pease, R. J. Webby, M. A. Barry, Replicating Single-Cycle Adenovirus

- 574 Vectors Generate Amplified Influenza Vaccine Responses. *Journal of virology* **91**,  
575 (2017).
- 576 25. W. E. Matchett, S. S. Anguiano-Zarate, M. A. Barry, Comparison of systemic and  
577 mucosal immunization with replicating Single cycle Adenoviruses. *Glob Vaccines*  
578 *Immunol* **3**, (2018).
- 579 26. W. E. Matchett, S. S. Anguiano-Zarate, P. N. Nehete, K. Shelton, B. P. Nehete, G.  
580 Yang, S. Dorta-Estremera, P. Barnette, P. Xiao, S. N. Byrareddy, F. Villinger, A. J.  
581 Hessel, N. L. Haigwood, K. J. Sastry, M. A. Barry, Divergent HIV-1-Directed  
582 Immune Responses Generated by Systemic and Mucosal Immunization with  
583 Replicating Single-Cycle Adenoviruses in Rhesus Macaques. *Journal of virology*  
584 **93**, (2019).
- 585 27. W. E. Matchett, G. B. R. Malewana, H. Mudrick, M. J. Medlyn, M. A. Barry, Genetic  
586 Adjuvants in Replicating Single-Cycle Adenovirus Vectors Amplify Systemic and  
587 Mucosal Immune Responses against HIV-1 Envelope. *Vaccines* **8**, (2020).
- 588 28. W. E. Matchett, S. S. Anguiano-Zarate, M. A. Barry, A Replicating Single Cycle  
589 Adenovirus against *Clostridium difficile*. *J. Infectious Dis.* *in review*, (2019).
- 590 29. K. R. Bartemes, K. Iijima, T. Kobayashi, G. M. Kephart, A. N. McKenzie, H. Kita,  
591 IL-33-responsive lineage- CD25<sup>+</sup> CD44(hi) lymphoid cells mediate innate type 2  
592 immunity and allergic inflammation in the lungs. *J Immunol* **188**, 1503-1513 (2012).
- 593 30. L. Karyampudi, C. J. Krco, K. R. Kalli, C. L. Erskine, L. C. Hartmann, K. Goodman,  
594 J. N. Ingle, M. J. Maurer, A. Nassar, C. Yu, M. L. Disis, P. J. Wettstein, J. D. Fikes,  
595 M. Beebe, G. Ishioka, K. L. Knutson, Identification of a broad coverage HLA-DR

- 596 degenerate epitope pool derived from carcinoembryonic antigen. *Cancer Immunol*  
597 *Immunother* **59**, 161-171 (2010).
- 598 31. P. M. Folegatti, K. J. Ewer, P. K. Aley, B. Angus, S. Becker, S. Belij-Rammerstorfer,  
599 D. Bellamy, S. Bibi, M. Bittaye, E. A. Clutterbuck, C. Dold, S. N. Faust, A. Finn, A.  
600 L. Flaxman, B. Hallis, P. Heath, D. Jenkin, R. Lazarus, R. Makinson, A. M.  
601 Minassian, K. M. Pollock, M. Ramasamy, H. Robinson, M. Snape, R. Tarrant, M.  
602 Voysey, C. Green, A. D. Douglas, A. V. S. Hill, T. Lambe, S. C. Gilbert, A. J.  
603 Pollard, C. V. T. G. Oxford, Safety and immunogenicity of the ChAdOx1 nCoV-19  
604 vaccine against SARS-CoV-2: a preliminary report of a phase 1/2, single-blind,  
605 randomised controlled trial. *Lancet*, (2020).
- 606 32. E. V. Shashkova, S. M. May, M. A. Barry, Characterization of human adenovirus  
607 serotypes 5, 6, 11, and 35 as anticancer agents. *Virology* **394**, 311-320 (2009).
- 608 33. C. M. Crosby, M. A. Barry, Illa deleted adenovirus as a single-cycle genome  
609 replicating vector. *Virology* **462-463**, 158-165 (2014).
- 610 34. M. A. Thomas, J. F. Spencer, W. S. Wold, Use of the Syrian hamster as an animal  
611 model for oncolytic adenovirus vectors. *Methods Mol Med* **130**, 169-183 (2007).
- 612 35. J. Hu, P. Peng, K. Wang, L. Fang, F. Y. Luo, A. S. Jin, B. Z. Liu, N. Tang, A. L.  
613 Huang, Emerging SARS-CoV-2 variants reduce neutralization sensitivity to  
614 convalescent sera and monoclonal antibodies. *Cell Mol Immunol*, (2021).
- 615 36. P. Wang, L. Liu, S. Iketani, Y. Luo, Y. Guo, M. Wang, J. Yu, B. Zhang, P. D. Kwong,  
616 B. S. Graham, J. R. Mascola, J. Y. Chang, M. T. Yin, M. Sobieszczyk, C. A.  
617 Kyratsous, L. Shapiro, Z. Sheng, M. S. Nair, Y. Huang, D. D. Ho, Increased

- 618 Resistance of SARS-CoV-2 Variants B.1.351 and B.1.1.7 to Antibody  
619 Neutralization. *bioRxiv*, (2021).
- 620 37. E. C. Sabino, L. F. Buss, M. P. S. Carvalho, C. A. Prete, Jr., M. A. E. Crispim, N.  
621 A. Fraiji, R. H. M. Pereira, K. V. Parag, P. da Silva Peixoto, M. U. G. Kraemer, M.  
622 K. Oikawa, T. Salomon, Z. M. Cucunuba, M. C. Castro, A. A. de Souza Santos, V.  
623 H. Nascimento, H. S. Pereira, N. M. Ferguson, O. G. Pybus, A. Kucharski, M. P.  
624 Busch, C. Dye, N. R. Faria, Resurgence of COVID-19 in Manaus, Brazil, despite  
625 high seroprevalence. *Lancet* **397**, 452-455 (2021).
- 626 38. E. A. Weaver, A. M. Rubrum, R. J. Webby, M. A. Barry, Protection against  
627 divergent influenza H1N1 virus by a centralized influenza hemagglutinin. *PloS one*  
628 **6**, e18314 (2011).
- 629 39. E. A. Weaver, M. A. Barry, Low seroprevalent species D adenovirus vectors as  
630 influenza vaccines. *PloS one* **8**, e73313 (2013).
- 631 40. T. V. Nguyen, G. J. Heller, M. E. Barry, C. M. Crosby, M. A. Turner, M. A. Barry,  
632 Evaluation of polymer shielding for adenovirus serotype 6 (Ad6) for systemic  
633 virotherapy against human prostate cancers. *Mol Ther Oncolytics* **3**, (2016).
- 634 41. M. A. Turner, S. Middha, S. E. Hofherr, M. A. Barry, Comparison of the Life Cycles  
635 of Genetically Distant Species C and Species D Human Adenoviruses Ad6 and  
636 Ad26 in Human Cells. *Journal of virology* **89**, 12401-12417 (2015).
- 637 42. E. A. Weaver, M. L. Hillestad, R. Khare, D. Palmer, P. Ng, M. A. Barry,  
638 Characterization of species C human adenovirus serotype 6 (Ad6). *Virology* **412**,  
639 19-27 (2011).

- 640 43. P. Abbink, A. A. Lemckert, B. A. Ewald, D. M. Lynch, M. Denholtz, S. Smits, L.  
641 Holterman, I. Damen, R. Vogels, A. R. Thorner, K. L. O'Brien, A. Carville, K. G.  
642 Mansfield, J. Goudsmit, M. J. Havenga, D. H. Barouch, Comparative  
643 seroprevalence and immunogenicity of six rare serotype recombinant adenovirus  
644 vaccine vectors from subgroups B and D. *Journal of virology* **81**, 4654-4663  
645 (2007).
- 646 44. M. D. Dicks, A. J. Spencer, L. Coughlan, K. Bauza, S. C. Gilbert, A. V. Hill, M. G.  
647 Cottingham, Differential immunogenicity between HAdV-5 and chimpanzee  
648 adenovirus vector ChAdOx1 is independent of fiber and penton RGD loop  
649 sequences in mice. *Sci Rep* **5**, 16756 (2015).
- 650 45. A. Greinacher, T. Thiele, T. E. Warkentin, K. Weisser, P. A. Kyrle, S. Eichinger,  
651 Thrombotic Thrombocytopenia after ChAdOx1 nCov-19 Vaccination. *N Engl J*  
652 *Med*, (2021).
- 653 46. K. L. Muir, A. Kallam, S. A. Koepsell, K. Gundabolu, Thrombotic Thrombocytopenia  
654 after Ad26.COV2.S Vaccination. *N Engl J Med*, (2021).
- 655 47. S. K. Campos, M. A. Barry, Current advances and future challenges in Adenoviral  
656 vector biology and targeting. *Current gene therapy* **7**, 189-204 (2007).
- 657 48. S. Colloca, E. Barnes, A. Folgori, V. Ammendola, S. Capone, A. Cirillo, L. Siani,  
658 M. Naddeo, F. Grazioli, M. L. Esposito, M. Ambrosio, A. Sparacino, M. Bartiromo,  
659 A. Meola, K. Smith, A. Kurioka, G. A. O'Hara, K. J. Ewer, N. Anagnostou, C. Bliss,  
660 A. V. Hill, C. Traboni, P. Klenerman, R. Cortese, A. Nicosia, Vaccine vectors  
661 derived from a large collection of simian adenoviruses induce potent cellular  
662 immunity across multiple species. *Sci Transl Med* **4**, 115ra112 (2012).

663 49. P. A. Piedra, G. A. Poveda, B. Ramsey, K. McCoy, P. W. Hiatt, Incidence and  
664 prevalence of neutralizing antibodies to the common adenoviruses in children with  
665 cystic fibrosis: implication for gene therapy with adenovirus vectors. *Pediatrics* **101**,  
666 1013-1019 (1998).

667

668

## 669 **FIGURE LEGENDS**

670 **Fig. 1. Replication-Defective and Single-Cycle Adenoviruses Expressing SARS-**  
671 **CoV-2 Spike. A)** Schematics of replication-defective adenovirus (RD-Ad) spike vaccine  
672 construct as compared to single-cycle adenovirus (SC-Ad) spike vaccine construct. In the  
673 RD-Ad spike vector, the E1 protein has been removed and the SARS-CoV-2 spike protein  
674 has been inserted. In the SC-Ad spike vector, the pIII<sub>A</sub> protein has been removed instead  
675 of the E1 protein, and the SARS-CoV-2 spike protein has been inserted. **B)** Western blot  
676 of human A549 lung cells infected with SC-Ad vector with GFP-Luciferase (SC-Ad  
677 GFP<sub>Luc</sub>), RD-Ad spike, or SC-Ad spike at doses of  $10^2$  and  $10^4$  viral particles per cell.  
678 Cells were harvested 24 hours post-infection, and western blot was performed looking for  
679 relative levels of SARS-CoV-2 spike protein.

680 **Fig. 2. Kinetics of Spike Antibody Production by RD-Ad and SC-Ad Vaccines after**  
681 **a Single Intranasal or Intramuscular Vaccination.** Male Syrian hamsters were  
682 immunized at a dose of  $10^9$  vp, and serum was collected at weeks 2, 6, 14, 26 after single  
683 immunization. Serum was used at 1:1000 dilution to test for SARS-CoV-2 spike IgG  
684 antibodies by ELISA. (\*\*\*\* =  $p < 0.0001$ , \*\*\* =  $p < 0.0001$ , \*\* =  $p < 0.01$ , \* =  $p < 0.05$ )

685 **Fig. 3. Spike Antibody Production by RD-Ad and SC-Ad Vaccines after a Single**  
686 **Intranasal or Intramuscular Vaccination. A)** Male Syrian hamsters were immunized at  
687 a dose of  $10^9$  vp, and serum was collected at 26 weeks (6 months) after single  
688 immunization. Serum was used at 1:100, 1:500, and 1:1000 dilutions to test for SARS-  
689 CoV-2 spike IgG antibodies by ELISA. **B)** Male Syrian hamsters were immunized and  
690 serum was collected at 6 weeks after single immunization. SARS-CoV-2 neutralization



691 assay (Genscript) was performed at 1:10, 1:33, and 1:100 serum dilutions comparing RD-  
692 Ad spike and SC-Ad spike at intranasal and intramuscular routes of immunization. spike  
693 inhibition rate was determined based on the formula provided by Genscript. **C, D)**  
694 Comparison of serum spike IgG antibodies in Syrian hamsters immunized with RD-Ad  
695 spike and SC-Ad spike by intramuscular (**C**) and intranasal (**D**) routes of administration,  
696 analyzed by ELISA at 1:1000 serum dilution. (\*\*\*\* =  $p < 0.0001$ , \*\*\* =  $p < 0.0001$ , \*\* =  
697  $p < 0.01$ , \* =  $p < 0.05$ )

698 **Fig. 4. Antibody Binding to Spike RBD and S1 Variants.** Week 14 sera from SC-Ad  
699 spike or SC-Ad-GL IM hamsters were analyzed for binding to variant RBDs and S1  
700 proteins by ELISA at 1:1000, 1:10,000, and 1:20,000 dilutions. All levels of significance  
701 are shown as compared to the sample's respective SC-Ad GL version. (\*\*\*\* =  $p < 0.0001$ ,  
702 \*\*\* =  $p < 0.0001$ , \*\* =  $p < 0.01$ , \* =  $p < 0.05$ ). More detailed statistical comparisons are shown  
703 in Supplemental Fig. 3.

704 **Fig. 5. Serum Antibody Production to Spike Protein after Single Intranasal or**  
705 **Intramuscular Administration of SC-Ad-Spike in Mice.** Male BALB/c mice were  
706 immunized at a dose of  $10^{10}$  vp virus, and serum was collected 2 weeks after single  
707 immunization and was tested for SARS-CoV-2 spike IgG antibodies by ELISA. (\*\*\*\* =  
708  $p < 0.0001$ , \*\*\* =  $p < 0.0001$ , \*\* =  $p < 0.01$ , \* =  $p < 0.05$ )

709 **Fig. 6. Mucosal Antibody Production to Spike Protein in Bronchoalveolar Lavages**  
710 **(BALs) after Single Intranasal or Intramuscular Administration of SC-Ad-Spike in**  
711 **Mice.** Male BALB/c mice were immunized with  $10^{10}$  vp of SC-Ad-Spike and  
712 bronchoalveolar lavage (BAL) fluid was collected at 8 weeks after single immunization.

713 **A)** BAL fluid was used at 1:500 dilution to test for SARS-CoV-2 spike IgG and IgA  
714 antibodies by ELISA. Plates were read at 450nm, and all analyses were done by one-  
715 way ANOVA. **B)** SARS-CoV-2 neutralization assay (Genscript) was performed at 1:10  
716 dilution of BAL fluid, comparing IN SC-Ad Zika, IN SC-Ad spike and IM SC-Ad spike. spike  
717 inhibition rate was determined based on the formula provided by Genscript. (\*\*\*\* =  
718  $p < 0.0001$ , \*\*\* =  $p < 0.0001$ , \*\* =  $p < 0.01$ , \* =  $p < 0.05$ ).

719 **Fig. 7. Changes in T Cell Populations in Bronchoalveolar Lavages (BALs) after**  
720 **Single Intranasal or Intramuscular Administration of SC-Ad-Spike in Mice.** 8 weeks  
721 after single immunization of  $10^{10}$  vp of SC-Ad-Spike in BALB/c mice, BAL was performed.  
722 Cells were pelleted out of BAL fluid and analyzed by flow cytometry. **A)** Shows number  
723 of CD8 T cells counted that expressed  $IFN\gamma$ . **B)** Shows number of CD4 T cells counted  
724 that expressed  $IFN\gamma$ . **C)** Shows number of CD4 T cells counted that expressed IL-4. (\*\*\*\*  
725 =  $p < 0.0001$ , \*\*\* =  $p < 0.0001$ , \*\* =  $p < 0.01$ , \* =  $p < 0.05$ ).

726



**Figure 2**     **Mudrick et. al.**

*Male Hamster Serum Antibodies*

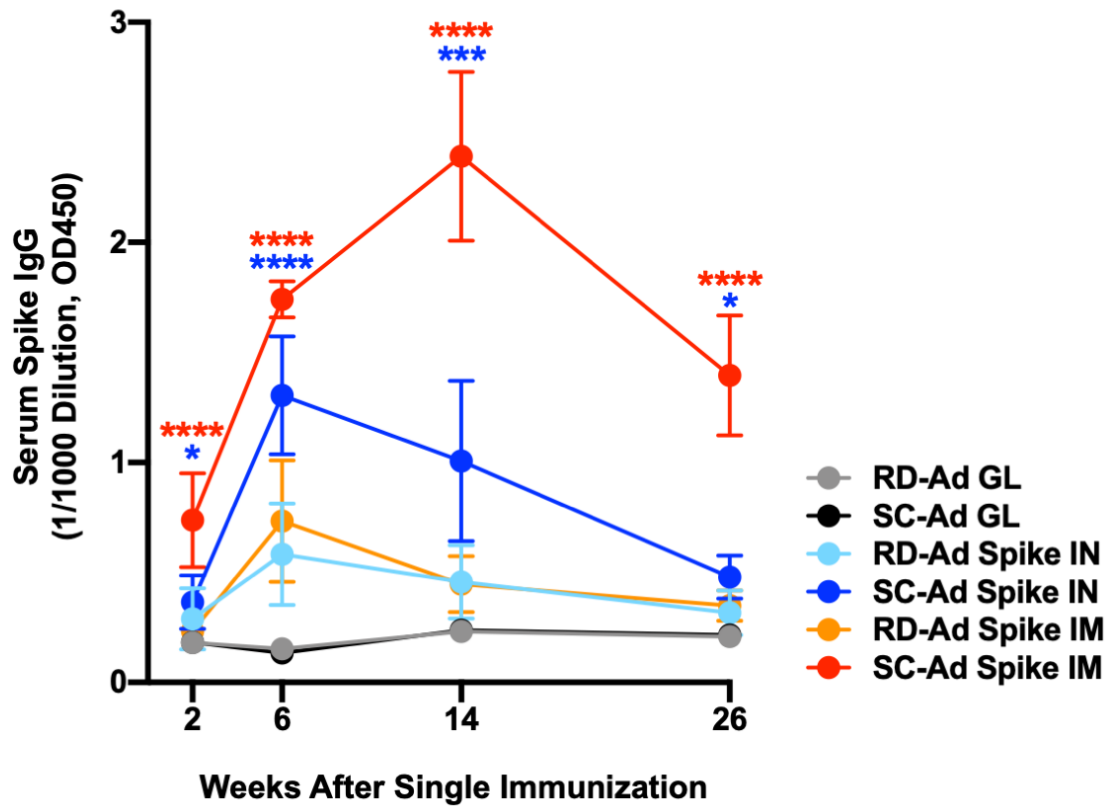

**Figure 3** Mudrick *et. al.*

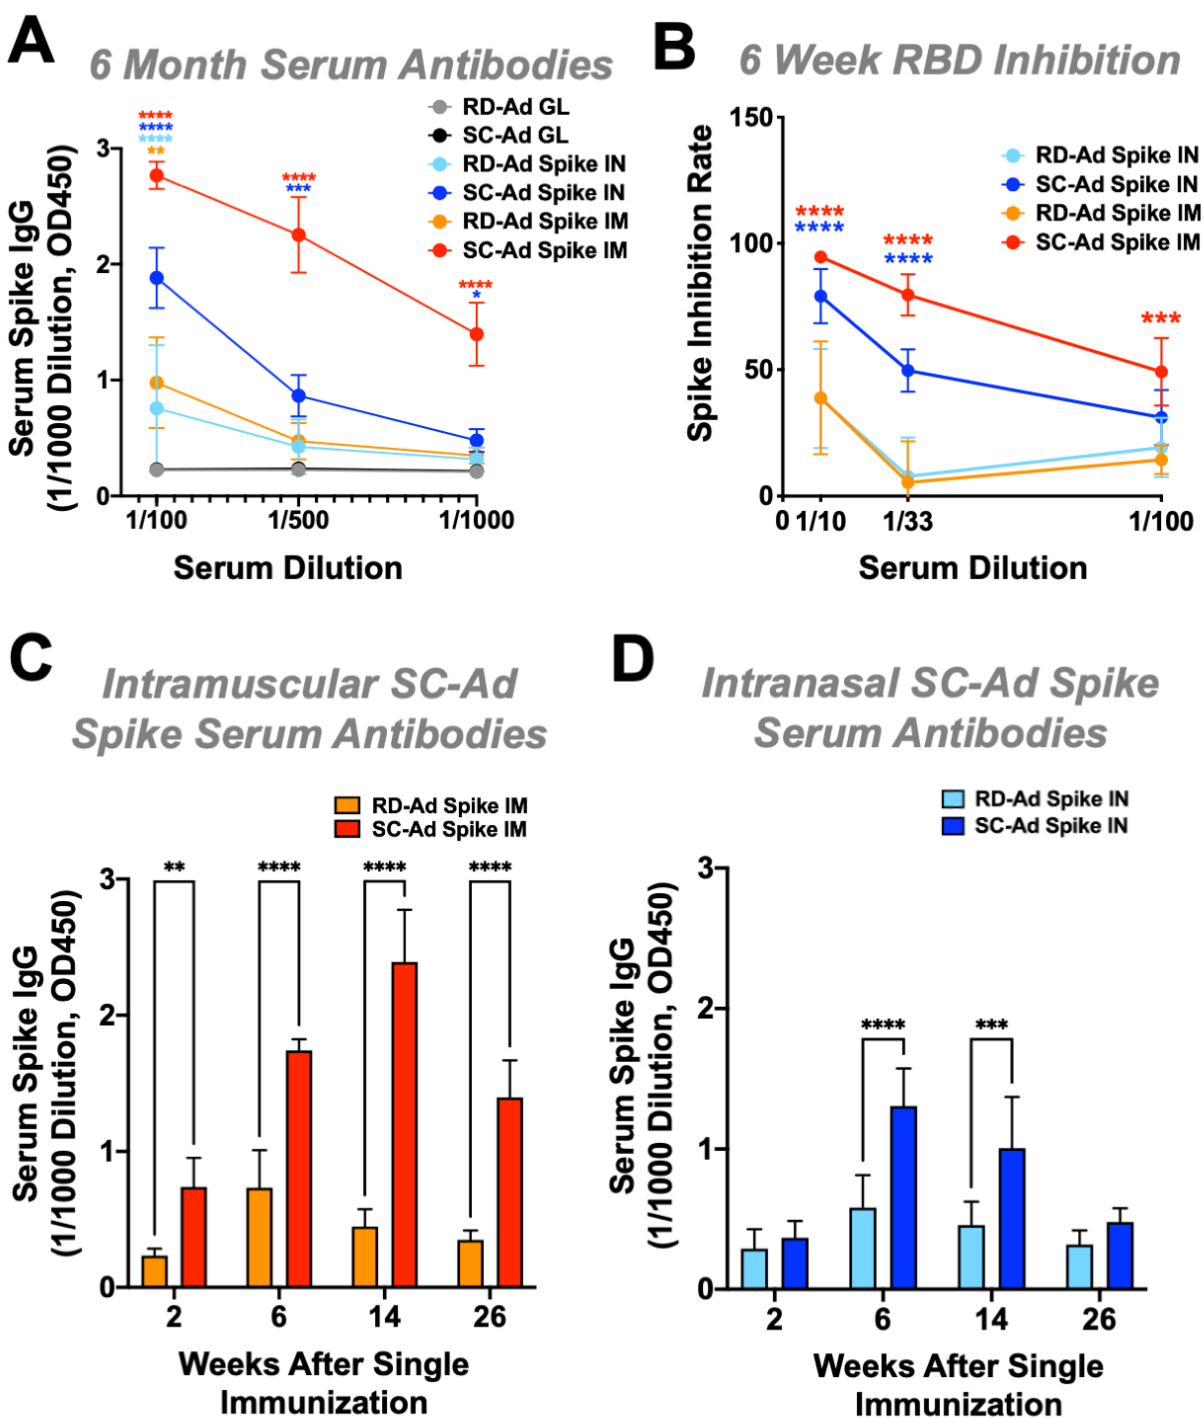

**Figure 4** Mudrick *et. al.*

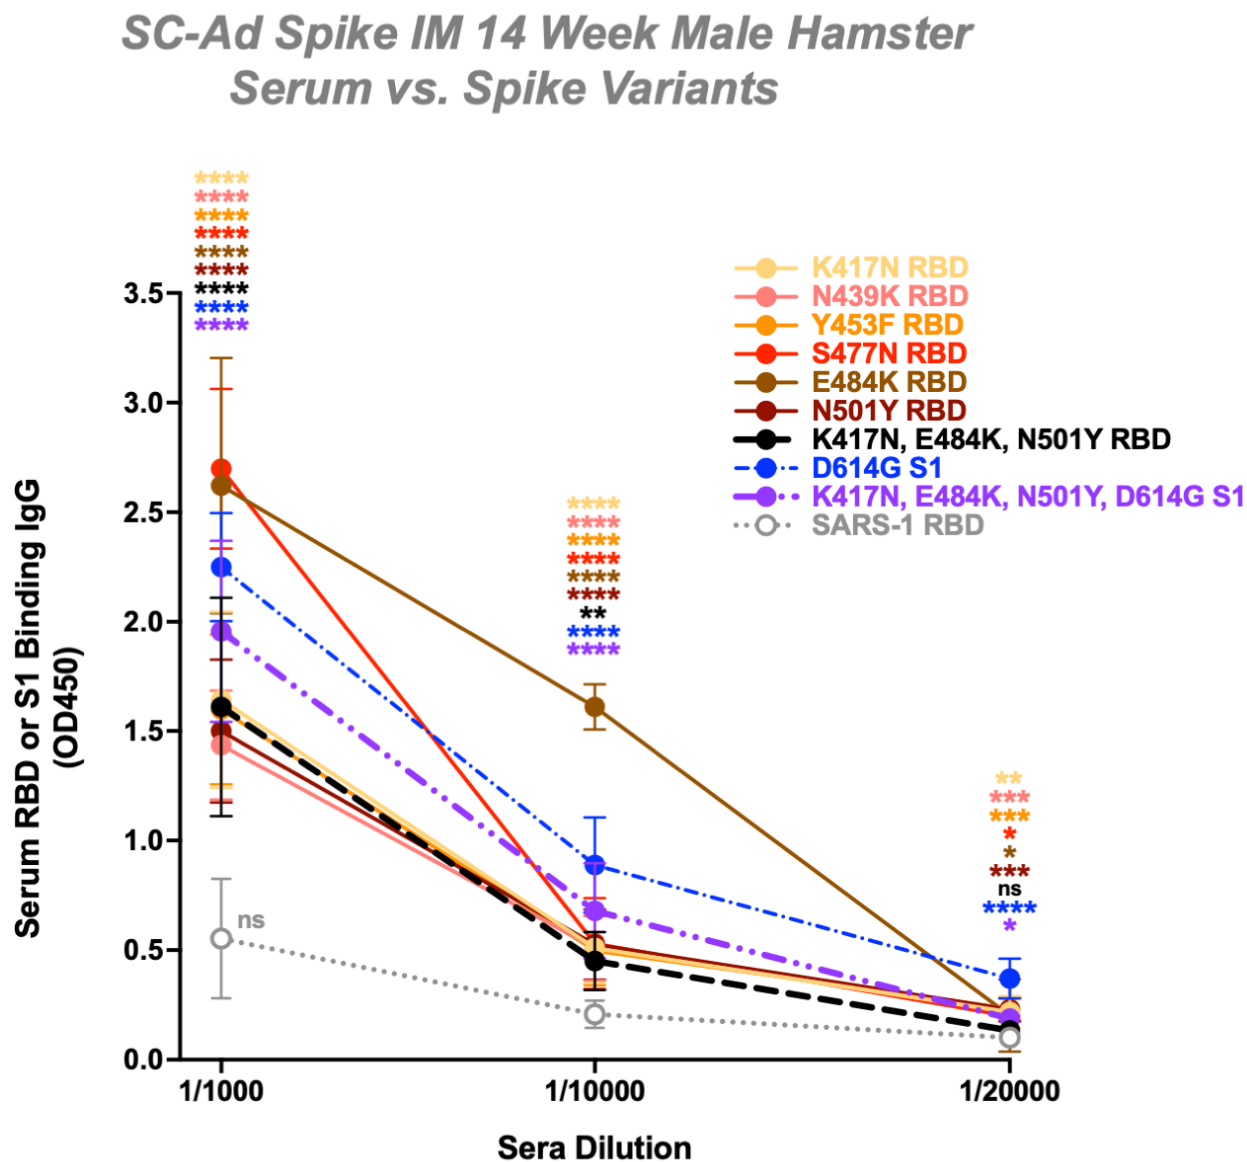

**Figure 5**      **Mudrick et. al.**

**A**      **2 Week Serum Antibodies BALB/c Mice**

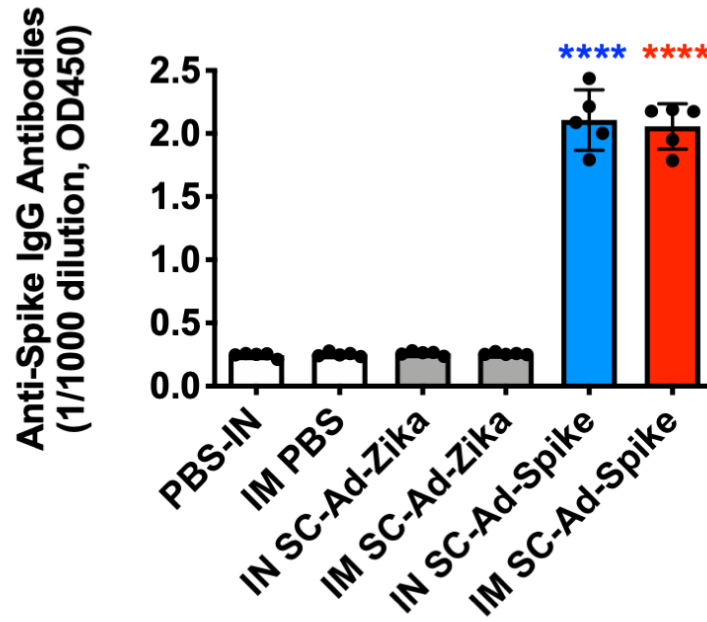

**Figure 6**      **Mudrick et. al.**

**8 Week BAL Antibodies BALB/c Mice**

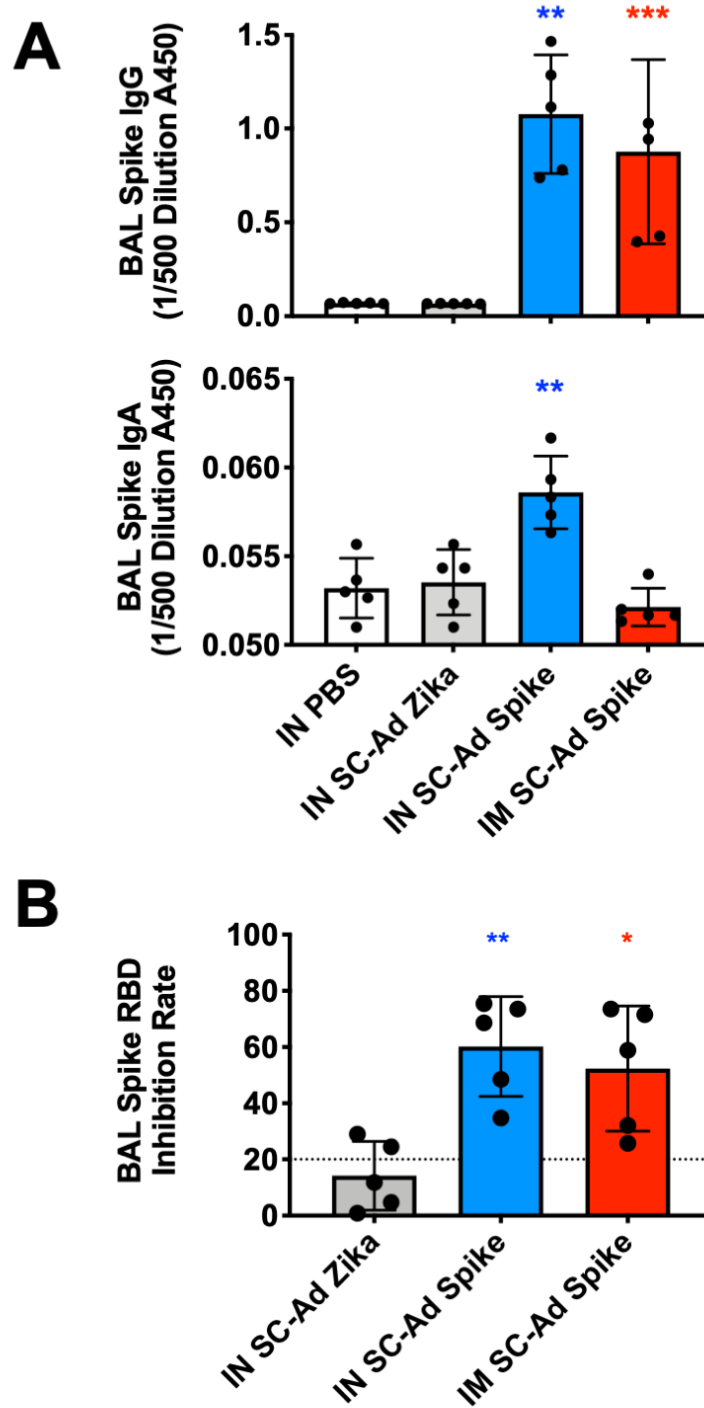



**Figure 7** Mudrick *et. al.*

**8 Week BAL Cells BALB/c Mice**

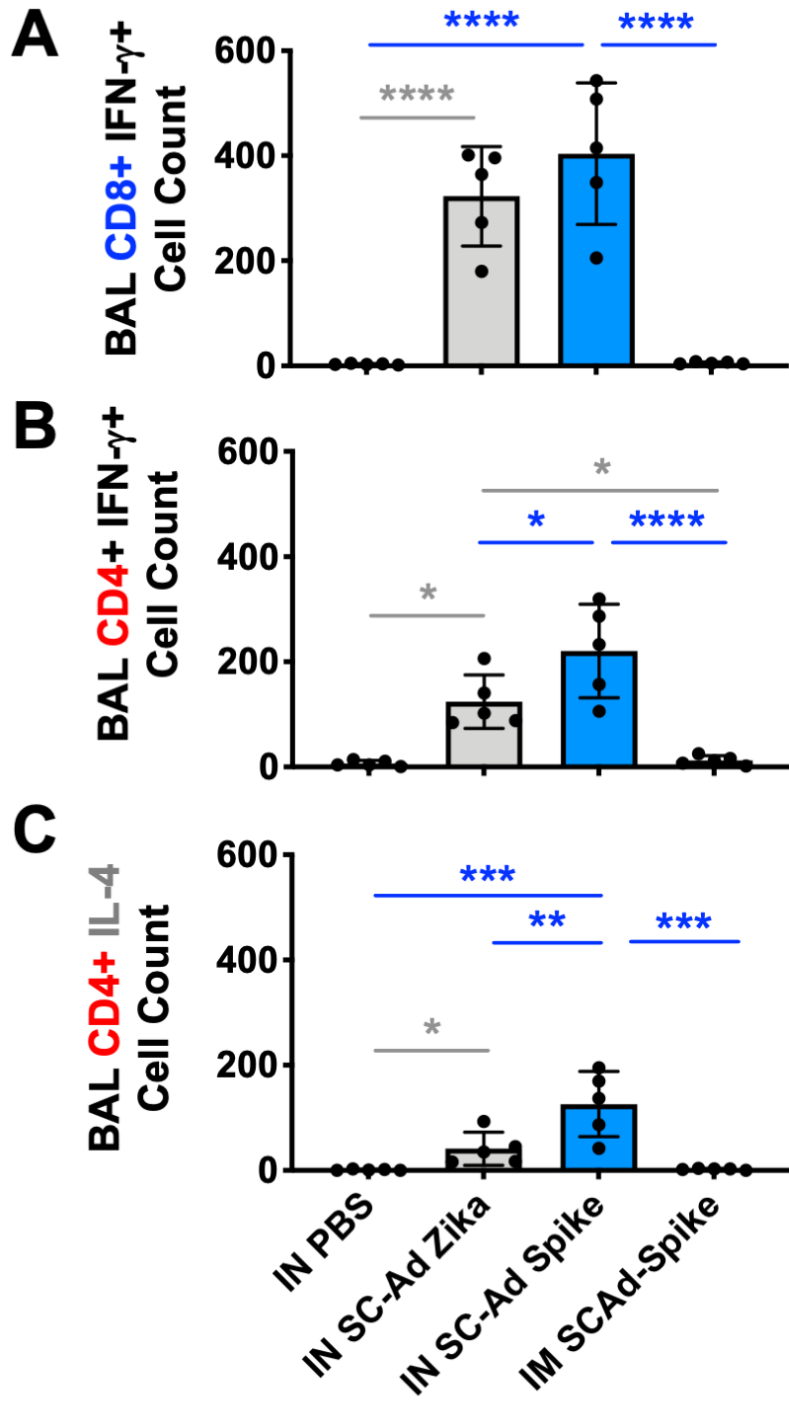

Source: https://www.biorxiv.org/content/10.1101/2021.04.20.440651v1.full.pdf
